# Supplementary material for: The Effects of Soluble Dietary Fibers on Glycemic Response: An Overview and Futures Perspectives
Source: MDPI journal article supplement (doi:10.3390/foods11233934), 2022-12-06
Supplement: s1 [file s1]

**Table S1.** Characteristics of clinical studies with significant responses on glycemic and insulin response

| Type of fiber                                               | Control                                                                 | Volunteers<br>(number/health<br>status or age)                                            | Dose                                     | Effects on glucose with<br>significant difference                                                                                                                                                            | Effects on insulin with<br>significant difference                                     | Publication                    |
|-------------------------------------------------------------|-------------------------------------------------------------------------|-------------------------------------------------------------------------------------------|------------------------------------------|--------------------------------------------------------------------------------------------------------------------------------------------------------------------------------------------------------------|---------------------------------------------------------------------------------------|--------------------------------|
| Alginate                                                    | Meal without<br>additive                                                | 7 T2DM                                                                                    | 5.0 g                                    | Reduced AUC = 31% <sup>d</sup>                                                                                                                                                                               | Reduced AUC = 42%                                                                     | Torsdottir et<br>al. 1991 [37] |
| Alginate                                                    | Acidic-gelling<br>control                                               | 40 healthy -<br>lower body fat<br>group (< 16.10%);<br>upper body fat<br>group (≥ 16.10%) | 1.5 g                                    | Reduced peak = 14%<br>Reduced AUC = 52%<br>No interference from body composition                                                                                                                             | Not evaluated                                                                         | Harden et al.<br>2012 [35]     |
| Alginate                                                    | Low volume<br>control - 330<br>mL<br>High volume<br>control - 500<br>mL | 20 healthy                                                                                | Low volume - 9.9 g<br>High volume - 15 g | iAUC High volume -alginate vs High<br>volume control = reduction 40%                                                                                                                                         | No significant effect                                                                 | Jensen et al.,<br>2012 [36]    |
| Alginate                                                    | Chocolate milk<br>(CM) – control<br>1                                   | 24 healthy                                                                                | 1.25%<br>2.5%                            | Reduced peak CM 2.5% vs CM 1.25%<br>= 32%<br>Reduced peak CM 2.5% vs CM = 46%<br>3 treatments with alginate - reduced<br>postprandial blood glucose in 0–120<br>min and 120–260 min                          | Reduced peak CM 2.5%<br>vs CM = 46%<br>Reduced CM 2.5% ~<br>2.5% solution (control 2) | El Khoury et<br>al., 2014 [34] |
|                                                             | Water – control<br>2                                                    |                                                                                           | 2.5%                                     |                                                                                                                                                                                                              |                                                                                       |                                |
| Alginate (Alg)                                              | Control meal –<br>noodles (CM)                                          | 15 healthy                                                                                | 3.2 g and 5.0 g                          | Reduced peak Alg 5% vs CM =-11%;<br>Alg 8% vs CM=15%<br>Reduced AUC Alg 5% vs CM 15%;<br>Alg 8% vs CM=21%                                                                                                    | Not evaluated                                                                         | Kato et al.,<br>2018 [38]      |
| Alginate (Alg)+<br>Soy protein isolate<br>(SPI), pH 6 and 7 | Beverage sugar<br>(C)                                                   | 12 healthy                                                                                | 0,63 g                                   | Reduced peak SPI6, SPI7, SPI6+Alg,<br>SPI7+Alg vs C=<br>33.4%, 36.3%, 53.2%, 58.5%<br>Reduced glucose peak<br>SPI6, SPI7 vs SPI6+Alg, SPI7+Alg<br>Reduced Glucose AUC<br>SPI6, SPI7, SPI6+Alg, SPI7+Alg vs C | Reduced peak insulin<br>SPI6, SPI7, SPI6+Alg,<br>SPI7+Alg vs C                        | Huang et al.,<br>2019 [39]     |
| Arabinoxylan (AX)                                           | Bread                                                                   | 14 healthy                                                                                | 6 g AX                                   | Reduced peak (6 g) vs control<br>(mmol/L) = 6.3 vs 7.2                                                                                                                                                       | Reduced AUC = 17.0%                                                                   | Lu et al., 2000<br>[40]        |

**Table 2.** Characteristics of clinical studies with significant responses on glycemic and insulin response

|                                                        |                              |                                              |                                                                                  |                                                                                                                                                                                  |                                                                                                                                                       |                                                       |
|--------------------------------------------------------|------------------------------|----------------------------------------------|----------------------------------------------------------------------------------|----------------------------------------------------------------------------------------------------------------------------------------------------------------------------------|-------------------------------------------------------------------------------------------------------------------------------------------------------|-------------------------------------------------------|
|                                                        |                              |                                              | 12 g AX                                                                          | Reduced AUC = 20.2%<br>Reduced peak (12 g) vs control (mmol/L) = 5.9 vs 7.2<br>Reduced AUC = 41.4%                                                                               | Reduced AUC = 32.7%                                                                                                                                   |                                                       |
| Arabinoxylan                                           | Liquid meal challenge test   | 12 overweight and impaired glucose tolerance | 15 g (6 weeks)                                                                   | Reduced postprandial response (in 240 min) after 6 weeks<br>Reduced fasting glucose (mmol/L) = 6.3 vs 5.4                                                                        | Reduced postprandial response (in 240 min) after 6 weeks                                                                                              | Garcia et al., 2006 [44];<br>Garcia et al., 2007 [43] |
| Arabinoxylan                                           | Bread and muffins            | 15 with DM2 and overweight                   | 15.1 g/day (5 weeks)                                                             | Reduced fasting glucose (mmol/L) = 7.6 ± 0.3 to 7.0 ± 0.3<br>Reduced OGTT (mmol/L) = 15.2 ± 0.9 to 13.4 ± 0.9                                                                    | Reduced fasting insulin (pmol/L) = 98 ± 10 to 77 ± 6<br>Reduced OGTT (pmol/L) = 656 ± 174 to 493 ± 121                                                | Lu et al., 2004 [41]                                  |
| Arabinoxylan (AX)<br>β-glucan (BG)<br>Rye kernels (RK) | Wheat bread                  | 15 with metabolic syndrome                   | Bread AX – 7.1 g (GI=89)<br>Bread BG – 2.6 g (GI=84)<br>Bread RK – 6.1 g (GI=77) | Peak glucose AX < control<br>iAUC BG vs control (mmol/L) = 266 ± 27 vs 330 ± 36<br>iAUC RK vs control (mmol/L) = 249 ± 27 vs 330 ± 36                                            | Reduced iAUC (nmol/L) BG vs control = 21.2 vs 25.3<br>RK vs control = 12.8 vs 25.3                                                                    | Hartvigsen et al., 2014 [51]                          |
| Arabinoxylan (AX)<br>Rye kernels (RK)                  | Semolina porridge (0.9 g AX) | 15 with metabolic syndrome                   | AX=3.5 g<br>RK=4.7 g AX<br>AXRK=4.4 g AX                                         | iAUC AXRK vs control (mmol/L) = 201 vs 258<br>Peak glucose AXRK vs control (mmol/L) = 8.7 vs 9.9<br>Reduced iAUC_AX relative to control (80%)                                    | iAUC AXRK vs control (nmol/L) = 16.8 vs 22.5<br>iAUC RK vs control (nmol/L) = 13.9 vs 22.5<br>iAUC AX vs RK and AXRK (nmol/L) = 20.9 vs 13.9 and 16.8 | Hartvigsen et al., 2014 [52]                          |
| Arabinoxylan                                           | Breakfast                    | 15 healthy                                   | AX=6 g                                                                           | No significant effect                                                                                                                                                            | iAUC (mmol × min/L) = 13.1 ± 2.56 vs 19.2 ± 4.9                                                                                                       | Möhlrig et al., 2005 [42]                             |
| Psyllium (AX)                                          | Placebo                      | 37 TD2M                                      | 6.8 g/day<br>13.6 g/day (12 weeks)                                               | 13.6 g and 6.6 g vs placebo<br>Reduced fasting glucose (4,8, 12 weeks)<br>13.6 g vs placeb<br>Reduced HbA1c (8 weeks)<br>13.6 g and 6.6 g vs placebo<br>Reduced HbA1c (12 weeks) | Not evaluated                                                                                                                                         | Feinglos et al., 2013                                 |

**Table 2.** Characteristics of clinical studies with significant responses on glycemic and insulin response

|                                      |                                                                             |            |                                            |                                                                                                                                                                                                                                                                             |                                                                                                            |                                   |
|--------------------------------------|-----------------------------------------------------------------------------|------------|--------------------------------------------|-----------------------------------------------------------------------------------------------------------------------------------------------------------------------------------------------------------------------------------------------------------------------------|------------------------------------------------------------------------------------------------------------|-----------------------------------|
| Psyllium (AX)                        | Regular diet (control group)                                                | 40 TD2M    | 10.5 g/day<br>8 weeks                      | Intervention vs control group<br>Reduced fasting blood sugar (mg/dl) = 163 to 119<br>Reduced HbA1c% = 8.5 to 7.5                                                                                                                                                            | Reduced insulin 27.9 to 19.7 $\mu$ IU/mL<br>Reduced HOMA-IR (11.3 to 5.8) and HOMA- $\beta$ % (103 to 141) | Abutair et al., 2016 [46]         |
| Psyllium (AX)                        | White bread (WB)<br>Gluten free bread (GFB)<br>25 g available carbohydrates | 13 healthy | 17.14 g psyllium<br>P-GFB                  | Reduced GI (25%) and GL (39%)<br>P-GFB vs GFB and WB                                                                                                                                                                                                                        | Not evaluated                                                                                              | Fratelli et al., 2018 [49]        |
| Psyllium (AX)                        | Cookies placebo                                                             | 51 TD2M    | 10 g psyllium<br>12 weeks                  | Reduced fasting plasma glucose (mg/dl) Psyllium vs Placebo (151.5 $\pm$ 43.1) vs (163.9 $\pm$ 39.5) and HbA1c % (7.6 $\pm$ 2.0) vs (9.0 $\pm$ 2.0)<br>Reduced fasting plasma glucose (mg/dl)<br>Psyllium – after 12 weeks (151.5 $\pm$ 43.1) vs baseline (171.0 $\pm$ 39.1) | No significant effect                                                                                      | Soltanian et al., 2018 [48]       |
| Psyllium (AX)<br>Flaxseed            | Cookies placebo                                                             | 77 TD2M    | 10 g psyllium or 10 g flaxseed<br>12 weeks | Reduced fasting plasma glucose (mg/dl)<br>Flaxseed and psyllium<br>After 12 weeks (147.3 $\pm$ 43.0) vs baseline (167.0 $\pm$ 38.2)<br>After follow-up 4 weeks (152.4 $\pm$ 38.0) vs baseline (167.0 $\pm$ 38.2)                                                            | No significant effect                                                                                      | Soltanian; Janghorbani, 2019 [49] |
| Psyllium (P)+<br>Chickpea flour (CF) | Rice flour () (75%) + cassava flour (25%) (GFB)                             | 12 healthy | 5,5% psyllium                              | Reduced GI<br>CF (79) and CF+P (75) vs GFB (100)<br>Reduced GL: 6.3 and 5.9 vs 12.4<br>Reduced iAUC mmol/L x min): 104 and 96 vs 134<br>Reduced glycemic response in 30, 45 and 60 min                                                                                      | Not evaluated                                                                                              | Santos et al., 2021 [50]          |

**Table 2.** Characteristics of clinical studies with significant responses on glycemic and insulin response

|                                                                                      |                                                                                             |            |                                                                                                                                                   |                                                                                                                                                                                                                                                                                 |                               |                                 |
|--------------------------------------------------------------------------------------|---------------------------------------------------------------------------------------------|------------|---------------------------------------------------------------------------------------------------------------------------------------------------|---------------------------------------------------------------------------------------------------------------------------------------------------------------------------------------------------------------------------------------------------------------------------------|-------------------------------|---------------------------------|
| β-glucan<br>(barley PW)                                                              | Wheat bread<br>(GI=100;<br>II=100)<br>Bread +<br>common barley<br>(GI=83; II=81)            | 10 healthy | 35% PW<br>50% PW<br>75% PW                                                                                                                        | Bread 35% PW – GI = 75<br>Bread 50% PW – GI = 65<br>Bread 75% PW – GI = 55                                                                                                                                                                                                      | II = 74<br>II = 65<br>II = 68 | Ostman et al.,<br>2006 [54]     |
| β-glucan<br>(oat and wheat)                                                          | Wheat bread                                                                                 | 9 healthy  | Raw rolled oats<br>Porridge - rolled oats<br>Porridge - oat kernels<br>Porridge - wheat kernels<br>Servings of 50 g of<br>available carbohydrates | Porridge - oat kernel - GI = 60<br>Porridge - wheat kernel - GI = 67                                                                                                                                                                                                            | II = 68<br>II = 68            | Granfeldt et al., 1995 [55]     |
| β-glucan<br>(BF-barley flour<br>SF- sieved fraction<br>WF-water-extract<br>fraction) | Bread wheat<br>flour                                                                        | 8 healthy  | Bread 50% BF (2.4%)<br>Bread 50% SF (4.2%)<br>Bread 20% WF (6.7%)                                                                                 | Reduced GI - only WF<br><br>Bread 20% WF – GI = 72                                                                                                                                                                                                                              | Not evaluated                 | Cavallero et al.<br>(2002) [56] |
| β-glucan                                                                             | Granola - 0.6 g<br>β-glucan<br>- in 40 and 60 g<br>total available<br>carbohydrate<br>(TAC) | 12 healthy | 6.2 g/40 g TAC<br>6.2 g/60 g TAC<br>β-glucan<br>with High, Medium and<br>Low MW (molecular<br>weight)                                             | Reduced peak = 40 g TAC > 60 g TAC<br>iAUC reduction = 40 g TAC > 60 g<br>TAC<br>Peak and iAUC reduction = HMW 60 g<br>TAC > MMW, LMW, and control;<br>Reduced peak = HMW 40 g TAC ><br>MMW, LMW 40 g TAC and control<br>iAUC reduction = HMW ~ MMW 40 g<br>TAC > LMW ~ control | Not evaluated                 | Regand et al.,<br>2011 [57]     |
| β-glucan                                                                             | 50 g glucose<br>(250 and 600<br>mL)                                                         | 15 healthy | 4 g High MW<br>4 g Low MW                                                                                                                         | Reduced peak HMW vs peak LMW =<br>3.13 vs 3.82 mmol/L                                                                                                                                                                                                                           | Not evaluated                 | Kwong et al.,<br>2013 [58]      |
| β-glucan<br>(by oat-bran<br>preload<br>- 5 min before)                               | White bread<br>(50 g available<br>carbohydrate)                                             | 10 healthy | 0.9 g (in 4.5 g oat-bran)<br>2.6 g (in 13.6 g oat-bran)<br>5.3 g (in 27.3 g oat-bran)                                                             | Reduced blood glucose<br>15 min – 27.3 g < 4.5 g and 0<br>30 min – 27.3 g < 13.6 g < 4.5 g and 0<br>45 min - 27.3 g < 13.6 g, 4.5 g and 0 g<br>AUC 27.3 g < AUC white bread                                                                                                     | Not evaluated                 | Steiner et al.,<br>2016 [63]    |

**Table 2.** Characteristics of clinical studies with significant responses on glycemic and insulin response

|                                  |                                    |                     |                                                                                                |                                                                                                                                                                                              |                                                                                                               |                                |
|----------------------------------|------------------------------------|---------------------|------------------------------------------------------------------------------------------------|----------------------------------------------------------------------------------------------------------------------------------------------------------------------------------------------|---------------------------------------------------------------------------------------------------------------|--------------------------------|
| β-glucan                         | Breakfast with β-glucan (control)  | 33 normal -weight   | 4 g HMW                                                                                        | Reduced blood glucose – 30 min Breakfast HMW vs control                                                                                                                                      | Reduced plasma insulin at 30 and 60 min Breakfast HMW vs control<br>Reduced AUC (μU/mL x 90 min) 1682 vs 2491 | Zaremba et al., 2018 [59]      |
| β-glucan                         | Cream of Rice (CR)                 | 28 without diabetes | Oatmeal 2 g β-glucan (2gOBG), Oatmeal 4 g β-glucan (4gOBG), Oat-bran plus β-glucanase (4gloMW) | Reduced AUC 2 h 2gOBG, 4gOBG and 4gloMW vs CR<br>4gOBG vs 2gOBG and 4gloMW<br>Reduced AUC 3 h 4gOBG vs CR<br>Reduced glucose peak 2gOBG, 4gOBG and 4gloMW vs CR<br>4gOBG vs 2gOBG and 4gloMW | Reduced AUC 2h 4gloMW vs CR<br>Reduced peak 4gloMW vs CR, 2gOBG and 4gOBG                                     | Wolever et al., 2020 [64]      |
| β-glucan                         | Standard diet program (for 1 week) | T1DM adolescents    | β-glucan 6 g/day (O6) for 1 week<br>β-glucan 3 g/day (O3) for 1 week                           | Reduced premeal and post meal blood glucose levels, and peak blood glucose in breakfast, lunch, and overall.<br>Delayed peaks for all time-points O6 vs O3                                   | Not evaluated                                                                                                 | Bozbulut et al., 2020 [62]     |
| β-glucan                         | 50 g glucose (200 mL)              | 16 healthy          | 4 g oat β-glucan with MW and viscosity variables                                               | Reduced iAUC 0–45 min < 63 vs 80 mmol × min/L (control)                                                                                                                                      | Not evaluated                                                                                                 | Wolever et al., 2020 [60]      |
| β-glucan                         | OGTT                               | 14 healthy          | Cereal β -glucan Low: 0.8 g; Medium: 3.2 g; High: 6.6 g In evening meal / 3 days               | Reduced blood glucose Medium vs Low, High and baseline                                                                                                                                       | Reduced blood glucose Medium vs Low, High and baseline<br>HOMA-IR no difference                               | Telle-Hansen et al., 2022 [66] |
| β-glucan (BG)<br>Psyllium (husk) | Durum wheat semolina pasta         | 10 healthy          | 15% Barley Balance (BB) (25% BG)<br>15% psyllium<br>7.5% BB + 7.5% psyllium                    | BB vs control – GI = 33 vs 52<br>BB + psyllium vs control – GI = 35 vs 52                                                                                                                    | Not evaluated                                                                                                 | Peressini et al., 2020 [65]    |

**Table 2.** Characteristics of clinical studies with significant responses on glycemic and insulin response

|                                                                                        |                                                                |                                            |                                                                                            |                                                                                                                                                                                                                                                                                                                                                                                                                                                                                                                                                                                                                       |                                                                                           |                              |
|----------------------------------------------------------------------------------------|----------------------------------------------------------------|--------------------------------------------|--------------------------------------------------------------------------------------------|-----------------------------------------------------------------------------------------------------------------------------------------------------------------------------------------------------------------------------------------------------------------------------------------------------------------------------------------------------------------------------------------------------------------------------------------------------------------------------------------------------------------------------------------------------------------------------------------------------------------------|-------------------------------------------------------------------------------------------|------------------------------|
| <i>Pleurotus sajor-caju</i> (PSC)<br>(BG source)                                       | Biscuit without addition (3.37 DF; $\beta$ -glucan (BG)=0.12%) | 11 healthy                                 | 6.19% (BG=1.06%)<br>8.62% (BG=1.29%)<br>9.84% (BG=1.78%)                                   | Reduced iAUC (mmol $\times$ min/L) = 8% (82.3 $\pm$ 11.0) and 12%, (79.7 $\pm$ 7.4) vs 0 (96.1 $\pm$ 8.1) and 4% (87.3 $\pm$ 10.4)<br>GI 4% = 52<br>GI 8% = 49<br>GI 12% = 47                                                                                                                                                                                                                                                                                                                                                                                                                                         | Not evaluated                                                                             | Ng et al., 2017 [70]         |
| <i>Pleurotus ostreatus</i> (P.o) and <i>Pleurotus cystidiosus</i> (P.c)<br>(BG source) | Glucose (75 g)                                                 | 22 healthy<br>28 T2DM on a controlled diet | 50 mg/kg body weight                                                                       | Reduced fasting glucose (healthy) (mmol/L) = P.o (4.5 to 4.3) and P.c (4.4 to 4.1)<br>Reduced postprandial (healthy) (mmol/L) = P.o 5.5 to 4.6) and P. c (5.3 to 4.6)<br>Reduced postprandial (T2DM) = P.o 14.9% and P.c 16.6%                                                                                                                                                                                                                                                                                                                                                                                        | Not evaluated for healthy<br>Increased postprandial (T2DM)<br>P.o.(21.7%) and P.c (21.0%) | Jayasuriya et al., 2015 [69] |
| <i>Pleurotus</i> spp (oyster mushroom)<br>(BG source)                                  | Ajwain biscuits<br>Time zero (T0)                              | 120 T2DM                                   | Ajwain + mushroom biscuits<br>Mushroom biscuits<br><br>DF dose not informed (for 3 months) | Reduced fasting glucose (mg/dL):<br>Ajwain + mushroom group (113.83 $\pm$ 4.03) vs T0 (225.41 $\pm$ 3.35)<br>Ajwain + mushroom (113.83 $\pm$ 4.02) vs Ajwain group (310.33 $\pm$ 3.31)<br>Mushroom group (112 $\pm$ 1.37) vs T0 (212.9 $\pm$ 4.29)<br>Mushroom (112 $\pm$ 1.37) vs Ajwain group (310.33 $\pm$ 3.31)<br><br>Reduced HbA1c %:<br>Ajwain + mushroom group (7.27 $\pm$ 0.14) vs T0 (8.47 $\pm$ 0.17)<br>Ajwain + mushroom (7.27 $\pm$ 0.14) vs Ajwain group (9.98 $\pm$ 0.14)<br>Mushroom group (6.99 $\pm$ 0.12) vs T0 (8.00 $\pm$ 0.13)<br>Mushroom (6.99 $\pm$ 0.12) vs Ajwain group (9.98 $\pm$ 0.14) | Not evaluated                                                                             | Agrawal et al., 2010 [68]    |
| <i>Pleurotus ostreatus</i><br>(BG source)                                              | Time zero                                                      | 27 men with T2DM and hypertension          | 3 g/day (for 3 months)                                                                     | Reduced fasting glucose (mmol/L) = 10.36 $\pm$ 0.72 to 8.48 $\pm$ 0.58                                                                                                                                                                                                                                                                                                                                                                                                                                                                                                                                                | Not evaluated                                                                             | Choudhury et al., 2013 [71]  |

**Table 2.** Characteristics of clinical studies with significant responses on glycemic and insulin response

|                                                             |                                    |                           |                                                    |                                                                                                                                                                            |                                                                                            |                                  |
|-------------------------------------------------------------|------------------------------------|---------------------------|----------------------------------------------------|----------------------------------------------------------------------------------------------------------------------------------------------------------------------------|--------------------------------------------------------------------------------------------|----------------------------------|
|                                                             |                                    |                           |                                                    | Reduced HbA1c% = $8.2 \pm 0.36$ to $7.1 \pm 0.31$                                                                                                                          |                                                                                            |                                  |
| <i>Pleurotus sajorcaju</i> powder (PSP) (BG source)         | Tortilla control (T0%)<br>Glucose  | 14 healthy                | Partial replace - Tortillas with 5, 10 and 15% PSP | Reduced iAUC (mmol x min/L):<br>T15% ( $119 \pm 17$ ) and T0% ( $106 \pm 11$ )<br>vs Glucose = ( $201 \pm 9$ )<br>Reduced GI: T15% (53) and T0% (58)<br>vs Glucose = (100) | Not evaluated                                                                              | Ishak et al., 2020 [73]          |
| <i>Pleurotus eryngii</i> (P.e)                              | Control meal                       | 19 with unhealthy obesity | Meal + P.e                                         | Reduced iAUC (mg/dL X 180 min)<br>Meal + P.e (948) vs Control meal (2160)                                                                                                  | No significant effect                                                                      | Kleftaki et al., 2022 [72]       |
| Guar gum (GG)                                               | Bread<br>Soup<br>Bread + soup      | 5 healthy                 | 5 g + bread<br>5 g + soup<br>10 g + bread and soup | Reduced peak = 41%<br>Reduced peak = 54%<br>Reduced peak = 68%                                                                                                             | Reduced peak = 37%<br>Reduced peak = 50%<br>Reduced peak = 65%                             | Wolever et al., 1979 [78]        |
| Guar gum                                                    | Bread                              | 11 healthy                | 5% bread weight<br>10%<br>15%                      | 10% reduction in 30 min                                                                                                                                                    | 5% -30/60 min = reduction<br>10% - 60 min = reduction (48%)<br>15% - 30/60 min = reduction | Ellis et al., 1981 [85]          |
| Guar gum                                                    | Bread + beverage                   | 30 healthy                | 5 g                                                | Reduced peak (45 min)<br>Reduced AUC                                                                                                                                       | Not evaluated                                                                              | Wolf et al, 2003 [16]            |
| Guar gum + whole-grain corn flour with high amylose content | Maltodextrin                       | 20 healthy                | ~ 15 g (dietary fiber)                             | Reduced AUC postprandial (240 min) and second meal in 2 products (cereal bar and smoothie drink)                                                                           | Reduced AUC postprandial (240 min) and second meal in 2 products                           | O'Connor and Campbell, 2016 [80] |
| Guar gum + Alginate                                         | Corn flakes bars                   | 48 healthy                | 5.5 g<br>1.6 g                                     | Reduced AUC = 33%<br>Reduced peak = 30%                                                                                                                                    | Not measured                                                                               | Williams et al., 2004 [76]       |
| Guar gum + whey protein (preload)                           | Glucose                            | 18 healthy olders         | 4,4 g + 16,4 g 27                                  | Reduced plasma glucose<br>Difference significant: 30, 45, 60 min<br>Reduced peak (mmol/L in 60 min):<br>$3.7 \pm 0.4$ vs $4.3 \pm 0.3$                                     | Increased plasma insulin (30 min):<br>$18.1 \pm 2.4$ vs $10.9 \pm 1.5$<br>colocar no texto | Pham et al., 2019 [83]           |
| Partially hydrolyzed guar gum (HG)                          | Control = normal diet<br>Time zero | 45 T2DM (n=22 control,)   | 10 g (HG) for 4 and 6 weeks                        | HG group vs control<br>Fasting plasma glucose (mmol/l)<br>7.4 vs 7.9<br>HbA1c (%) 6.8 vs 6.9                                                                               | Not evaluated                                                                              | Dall'Alba et al., 2013           |

**Table 2.** Characteristics of clinical studies with significant responses on glycemic and insulin response

|                                                                                              |                                     |                                                          |                                                                                    |                                                                                                                                                                                                                                              |                                                                        |                              |
|----------------------------------------------------------------------------------------------|-------------------------------------|----------------------------------------------------------|------------------------------------------------------------------------------------|----------------------------------------------------------------------------------------------------------------------------------------------------------------------------------------------------------------------------------------------|------------------------------------------------------------------------|------------------------------|
| Guar gum (G)<br>Whey protein (W)<br>Guar gum + whey protein (WG) (preload)                   | Mashed potato meal (C)              | 21 with T2DM                                             | 5 g<br>17g<br>5 g + 17 g                                                           | Reduced blood glucose<br>W and WG vs C (30, 60, 90, 180 min)<br>G vs C (30, 180 min)<br>WG vs G (60, 90 min)<br>Reduced aUC WG vs G                                                                                                          | Reduced W vs C (30, 90 min)                                            | Watson et al., 2019 [82]     |
| Partially hydrolyzed guar gum (HG) + highly cooked potato (HP) HG<br>HP (preload 30 min (P)) | Rice meal (R)<br><br>R+HP<br>R+HG   | 17 healthy females                                       | 50 g available carbohydrates (15 g from potato in R+HP)<br>~12 g HG in 100 g water | Reduced blood glucose<br>PHG+PHP+R or PHP+HG+R vs R and PHP+R (30 min);<br>PHG+PHP+R vs PHP+HG+R (30 min)<br>Reduced peak in 15, 30, 45 min, and delayed peak, higher glycemic increments at 60, 90, 120 min<br>PHG+HP+R vs R, HP+R, HG+HP+R | Not evaluated<br>Not measured?<br>padronizar                           | Zhao et al., 2020 [84]       |
| Galactomannan + inulin + $\beta$ -glucan (1:1:1)                                             | 2.0 g/day (Insoluble dietary fiber) | 30 with mild hyperglycemia and visceral fat accumulation | 7.5 g/day DF (12 weeks)                                                            | Reduced fasting glucose = -0.5 mmol/L (6.47 vs 5.96)                                                                                                                                                                                         | Reduced Fasting insulin = ~20 nmol/L<br>Reduced HOMA 3.2 to 2.2        | Kobayakawa et al., 2013 [77] |
| Konjac galactomannan (KGM)                                                                   | OGTT (75 g glucose)                 | 20 T2DM                                                  | GM (1 g) - preload<br>GM (3 g) for 4 weeks – Long-term                             | Preload - Reduced rise blood glucose in OGTT<br>Long-term - Reduced glucose AUC in 120 min                                                                                                                                                   | Preload - No reduced rise blood insulin<br>Long-term - Reduced HOMA-IR | Chearskul et al., 2007 [88]  |
| KGM                                                                                          | Placebo noodles (PN)                | 32 with metabolic syndrome                               | KGM Noodles (400 g – 1 GM) for 4 weeks                                             | GI (n=10) = KGM Noodles (34) vs PN (77)<br>No reduced in fasting blood glucose<br>Reduced HbA1c in T2DM (n=24)                                                                                                                               | No reduced in fasting blood insulin and HOMA-IR                        | Cheang et al., 2017 [89]     |
| KGM+Xanthan gum<br>Guar gum+Xanthan gum                                                      | Beverage no added                   | 20 healthy men                                           | KGM+Xanthan gum (90:10) – 0,29%<br>Guar gum+Xanthan gum (50:50) – 0,44%            | No reduced glycemic response                                                                                                                                                                                                                 | No reduced insulin response                                            | Paquet et al., 2014 [79]     |
| Glucomannan flour (GMF)                                                                      | Soy milk ice cream (control)        | 9 healthy                                                | Soy milk ice cream with 2.5 % GMF (SIC2.5%)                                        | Reduced glycemic response<br>SIC2.5% vs control<br>GI = 56, GL = 9 vs GI = 76, GL = 12                                                                                                                                                       | Not evaluated                                                          | Sa'adah et al., 2018 [106]   |



**Table 2.** Characteristics of clinical studies with significant responses on glycemic and insulin response

|                                                                                                        |                                                 |                          |                                       |                                                                                                                                                                               |                                                                                                                                 |                                      |
|--------------------------------------------------------------------------------------------------------|-------------------------------------------------|--------------------------|---------------------------------------|-------------------------------------------------------------------------------------------------------------------------------------------------------------------------------|---------------------------------------------------------------------------------------------------------------------------------|--------------------------------------|
| Pectin (PTD)<br>Cellulose (CED)                                                                        | Fiber-free<br>control diet<br>(CD)              | 8 healthy women          | 10 g PTD<br>10 g CED                  | PTD vs CD and CED vs CD – Reduced<br>AUC<br>PTD vs CED – no difference                                                                                                        | Not evaluated                                                                                                                   | Lee et al. 2006<br>[91]              |
| Pectin from fruits<br>of the date palm<br>(different cultivars)                                        | Glucose                                         | at least 6 healthy       | 50 g carbohydrates                    | Itima GI = 31<br>Aliwrached GI=36<br>Tinissine GI = 37<br>Bentqbal GI = 42<br>Ghars GI = 49<br>Mizit GI = 52                                                                  | Not evaluated                                                                                                                   | Yamina et al.,<br>2021 [92]          |
| Pullulan                                                                                               | MD                                              | 28 non diabetic<br>adult | 50 g added at beverages               | Pullulan vs MD - Reduced incremental<br>peak (mmol/L) $4.24 \pm 0.35$ vs. $1.97 \pm 0.10$ and iAUC (50%)                                                                      | Not evaluated                                                                                                                   | Wolf et al.,<br>2003 [16]            |
| Pullulan                                                                                               | MD                                              | 34 healthy               | 50 g added at beverages               | No significant effect                                                                                                                                                         | Reduced incremental<br>peak insulin (23%) and<br>AUC (20%)                                                                      | Spears et al.,<br>2005 [93]          |
| Pululan<br>Pululan + SCF70<br>SCF 70<br>RS 75<br>RS 60<br>RS +SCF 70<br>Soluble Fiber<br>Dextrin (SFD) | 2 control meals<br>(50 g of<br>glucose)         | 12 healthy               | 25 g DF                               | Fibers vs control – Reduced iAUC at<br>all times<br>iAUC SFD (mmol $\times$ min/L) = $50.1 \pm 6.9$ (value much higher than the others)<br>vs $8.7 \pm 4.1$ to $28.5 \pm 5.6$ | iAUC SFD (mUI $\times$ min)<br>= $449 \pm 120$ (value much<br>higher than the others) vs<br>$50 \pm 29$ to $161 \pm 52$         | Kendall et al.,<br>2008 [28]         |
| Pullulan<br>Long-chain (LCP)<br>Medium-chain<br>(MCP)                                                  | MD                                              | 12 healthy/group         | 15 g                                  | Reduced excursion glucose:<br>LDP<MSP<MD                                                                                                                                      | Reduced excursion<br>insulin: LDP<MSP<MD<br>Reduced AUX (mmol $\times$<br>min) = LCP (11.32),<br>MCP (15.73) and MDX<br>(17.90) | Peters et al.,<br>2011 [94]          |
| RMD<br>(tapioca - TRM)                                                                                 | Glucose (GL)<br>Tapioca<br>maltodextrin<br>(TM) | 16 healthy               | TRM<br>MIX15 (7.5 g TRM +<br>42.5 TM) | Reduced plasma glucose (mg/dl)<br>TRM ( $104.60 \pm 2.63$ ) vs GL ( $135.87 \pm 4.88$ ), TM ( $127.93 \pm 4.05$ ), MIX15<br>( $124.67 \pm 5.73$ ) MIX50 ( $129.33 \pm 5.23$ ) | Reduced plasma insulin<br>( $\mu$ IU/ml)<br>( $13.01 \pm 2.12$ ) vs GL<br>( $47.90 \pm 11.93$ ), TM                             | Astina;<br>Sapwarobol,<br>2020 [101] |

**Table 2.** Characteristics of clinical studies with significant responses on glycemic and insulin response

|                                 |                                                                 |                                                        |                                                              |                                                                                                                                            |                                                                                                                            |                            |
|---------------------------------|-----------------------------------------------------------------|--------------------------------------------------------|--------------------------------------------------------------|--------------------------------------------------------------------------------------------------------------------------------------------|----------------------------------------------------------------------------------------------------------------------------|----------------------------|
|                                 |                                                                 |                                                        | MIX50 (25 g TRM + 25 TM)                                     |                                                                                                                                            | (52.96 ± 17.68), MIX50% (33.16 ± 4.99)                                                                                     |                            |
| RMD (tapioca - TRM)             | Oral nutrition supplements (ONS)                                | 17 healthy (acute evaluation)<br>22 healthy (12 weeks) | TRM15 (15 % TRM replacement)<br>TRM30 (30 % TRM replacement) | Reduced HbA1c% after 12 weeks TRM30 (5.2 ± 0.07) vs (baseline 5.5 ± 0.07)                                                                  | AUC insulin TRM30 (33.12%) vs TRM15 (12,97%) and ONS – acute study                                                         | Astina et al., 2022 [100]  |
| Nutriose                        | MD                                                              | 120 overweight men                                     | 34 g/day (12 week)                                           | Reduced HbA1c (- 0.45 ± 0.15%) in individuals with metabolic syndrome                                                                      | Reduced HOMA = 18%                                                                                                         | Li et al., 2010 [19]       |
| Nutriose                        | MD                                                              | 65 females T2DM                                        | 10 g/day 8 weeks                                             | Reduced fasting plasma glucose (9.8%) Nutriose vs MD                                                                                       | Not evaluated                                                                                                              | Farhangi et al., 2019 [97] |
| Nutriose                        | MD                                                              | 36 normal weight+overweight                            | 14 g/day Preload/28 days                                     | Reduced glycemic response (mmol/L) in mid-morning in day 14 (88.3 ± 4.6) and day 28 (88.1 ± 4.6) vs baseline (95.3 ± 4.9) and (93.3 ± 4.7) | Not evaluated                                                                                                              | Hobden et al., 2021 [98]   |
| Soluble corn fiber (SCF)        | Maltodextrin (MD)<br>Glucose                                    | 22 healthy                                             | ~25 g SCF (glutinous rice + SCF and beverage +SCF)           | Reduced iAUC relative to MD and glucose<br>Rice - reduction at all studied times<br>Beverage - reduction at 55 and 100 min                 | Reduced iAUC in relation to MD and glucose<br>Rice - reduction up to 70 min<br>Beverage – reduction between 40 and 130 min | Tan et al., 2020 [102]     |
| SCF<br>Polidextrose (PDX)       | Diets: FULL energetic and ISO energetic                         | 18 overweight                                          | 55 g SCF<br>57 g PDX                                         | SCF or PDX vs FULL – Reduced peak after breakfast<br>SCF vs FULL = FULL – Reduced peak after second meal                                   | SCF or PDX vs FULL – Reduced AUC after breakfast and second meal                                                           | Konings et al., 2014 [28]  |
| Glucomannan + xanthan gum (7:3) | Biscuit without DF<br>Wheat bread,<br>Bread with 12 g margarine | 10 healthy<br>9 T2DM                                   | 10 g (in biscuits)                                           | Reduced GI<br>GI (healthy) = 26<br>GI (DM2) = 37                                                                                           | Not evaluated                                                                                                              | Jenkins et al., 2008 [103] |

Glycemic index (GI); Insulinemic index (II); Area under the curve (AUC); Incremental area under the curve (iAUC); Dietary fiber (DF); Prowashonupana Barley (PW); Barley flour (BF); Sieved fraction (SF); Water-extracted fraction (WF); High molecular weight (HMW); Low molecular weight (LMW); Glycated hemoglobin (HbA1c), homeostasis

**Table 2.** Characteristics of clinical studies with significant responses on glycemic and insulin response

model assessment (HOMA); Diabetes type 2 (DM2); Oral glucose tolerance test (OGTT); Glycemic response (GR), Insulinemic response (IR); Body mass index (BMI); Oat  $\beta$ -glucan (OBG); Barley balance (BB).
